# Supplementary material for: Identification of peptide domains involved in the subcellular localization of the feline coronavirus 3b protein
Source: PubMed Central journal article supplement (PMC7079696; doi:10.1099/jgv.0.001321), 2019-09-04
Supplement: jgv-100-1417-s001.pdf [file jgv-100-1417-s001.pdf]

**Table S1. GenBank accession numbers used for multiple sequence alignment.**

|            |            |            |            |
|------------|------------|------------|------------|
| ACI13494.1 | AIL54148.1 | AIN55806.1 | AIN55969.1 |
| ACI13497.1 | AIL54151.1 | AIN55808.1 | AIN55972.1 |
| ACI13501.1 | AIL54154.1 | AIN55810.1 | AIN55975.1 |
| ACI13505.1 | AIL54157.1 | AIN55812.1 | AIN55978.1 |
| ACI13508.1 | AIL54160.1 | AIN55814.1 | AIN55981.1 |
| ACI13512.1 | AIL54163.1 | AIN55816.1 | AIN55984.1 |
| ACI13516.1 | AIL54166.1 | AIN55818.1 | AIN55987.1 |
| ACI13520.1 | AIL54169.1 | AIN55820.1 | AIN55990.1 |
| ACI13524.1 | AIL54172.1 | AIN55822.1 | AIN55992.1 |
| ACI13528.1 | AIL54175.1 | AIN55824.1 | AIN55995.1 |
| ACI13532.1 | AIL54178.1 | AIN55826.1 | AIN55997.1 |
| ACI13536.1 | AIL54181.1 | AIN55828.1 | AIN55999.1 |
| ACI13540.1 | AIL54184.1 | AIN55831.1 | AIN56001.1 |
| ACI13544.1 | AIL54187.1 | AIN55833.1 | AIN56003.1 |
| ACI13548.1 | AIL54190.1 | AIN55835.1 | AIN56004.1 |
| ACI13552.1 | AIL54193.1 | AIN55837.1 | AJO26975.1 |
| ACI13556.1 | AIL54196.1 | AIN55839.1 | AJO26985.1 |
| ACI13559.1 | AIL54199.1 | AIN55840.1 | AJO26995.1 |
| ACI13564.1 | AIL54201.1 | AIN55842.1 | AJO27005.1 |
| ACI13568.1 | AIL54204.1 | AIN55847.1 | AJO27015.1 |
| ACI13571.1 | AIL54206.1 | AIN55851.1 | AJO27025.1 |
| ACI13576.1 | AIL54208.1 | AIN55855.1 | AMD11132.1 |
| ACI13580.1 | AIL54210.1 | AIN55862.1 | AMD11144.1 |
| ACI13584.1 | AIL54211.1 | AIN55864.1 | AMD11155.1 |
| ACI13588.1 | AIL54212.1 | AIN55868.1 | AMD11166.1 |
| ACI13592.1 | AIL54214.1 | AIN55872.1 | AMD11177.1 |
| ACI13595.1 | AIL54216.1 | AIN55878.1 | AMD11188.1 |
| ACI13598.1 | AIL54219.1 | AIN55880.1 | AMD11199.1 |
| ACI13606.1 | AIL54222.1 | AIN55884.1 | AMD11210.1 |
| ACI13609.1 | AIL54224.1 | AIN55888.1 | AMD11221.1 |
| ACI13613.1 | AIL54226.1 | AIN55891.1 | AMD11232.1 |
| ACI13617.1 | AIL54229.1 | AIN55897.1 | ASU62490.1 |
| ACI13620.1 | AIL54231.1 | AIN55901.1 | AWU66525.1 |
| ACI13623.1 | AIL54234.1 | AIN55905.1 | BAJ08257.1 |
| ACI13627.1 | AIL54237.1 | AIN55909.1 |            |
| ACI13631.1 | AIL54240.1 | AIN55912.1 |            |
| ACI13635.1 | AIL54242.1 | AIN55931.1 |            |
| ACI13639.1 | AIN55751.1 | AIN55934.1 |            |
| ACI13643.1 | AIN55755.1 | AIN55937.1 |            |
| AIL54121.1 | AIN55759.1 | AIN55940.1 |            |
| AIL54124.1 | AIN55764.1 | AIN55943.1 |            |
| AIL54127.1 | AIN55766.1 | AIN55946.1 |            |
| AIL54130.1 | AIN55769.1 | AIN55951.1 |            |
| AIL54133.1 | AIN55774.1 | AIN55954.1 |            |
| AIL54136.1 | AIN55778.1 | AIN55957.1 |            |
| AIL54139.1 | AIN55800.1 | AIN55960.1 |            |
| AIL54142.1 | AIN55802.1 | AIN55963.1 |            |
| AIL54145.1 | AIN55804.1 | AIN55966.1 |            |
